# Supplementary material
Source: publisher site journal article supplement (https://www.dovepress.com/article/270062)

**A**

Stage1+2 ~SCAMP3 mRNA expression  
**SCAMP3 (10067)**

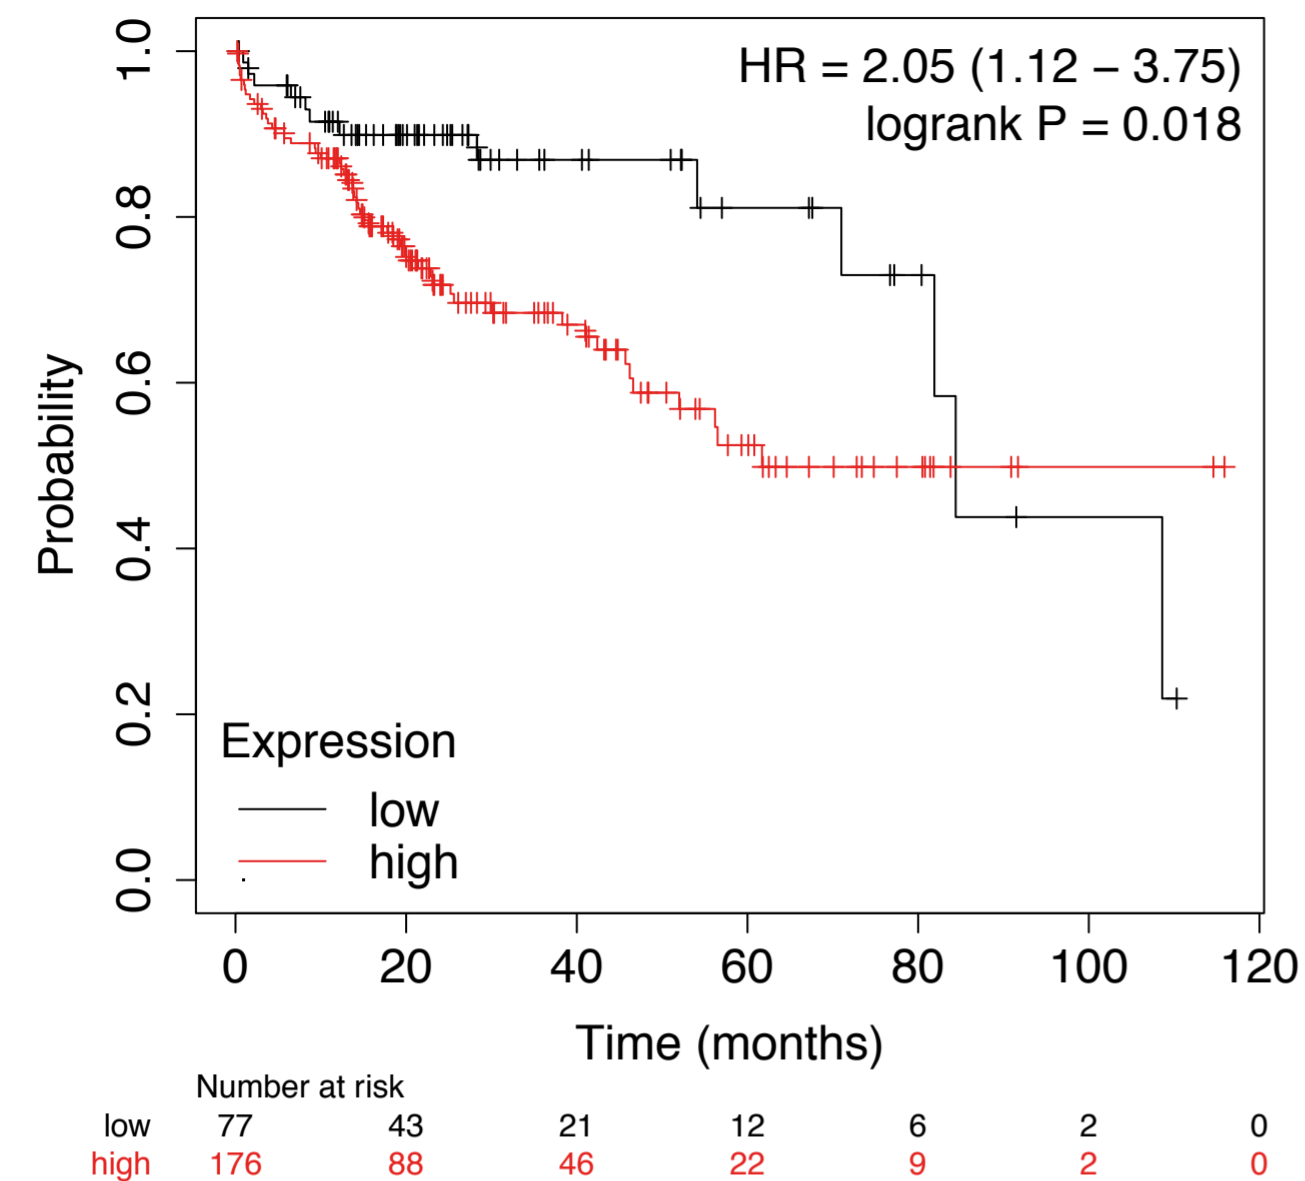**B**

Stage3~SCAMP3 mRNA expression  
**SCAMP3 (10067)**

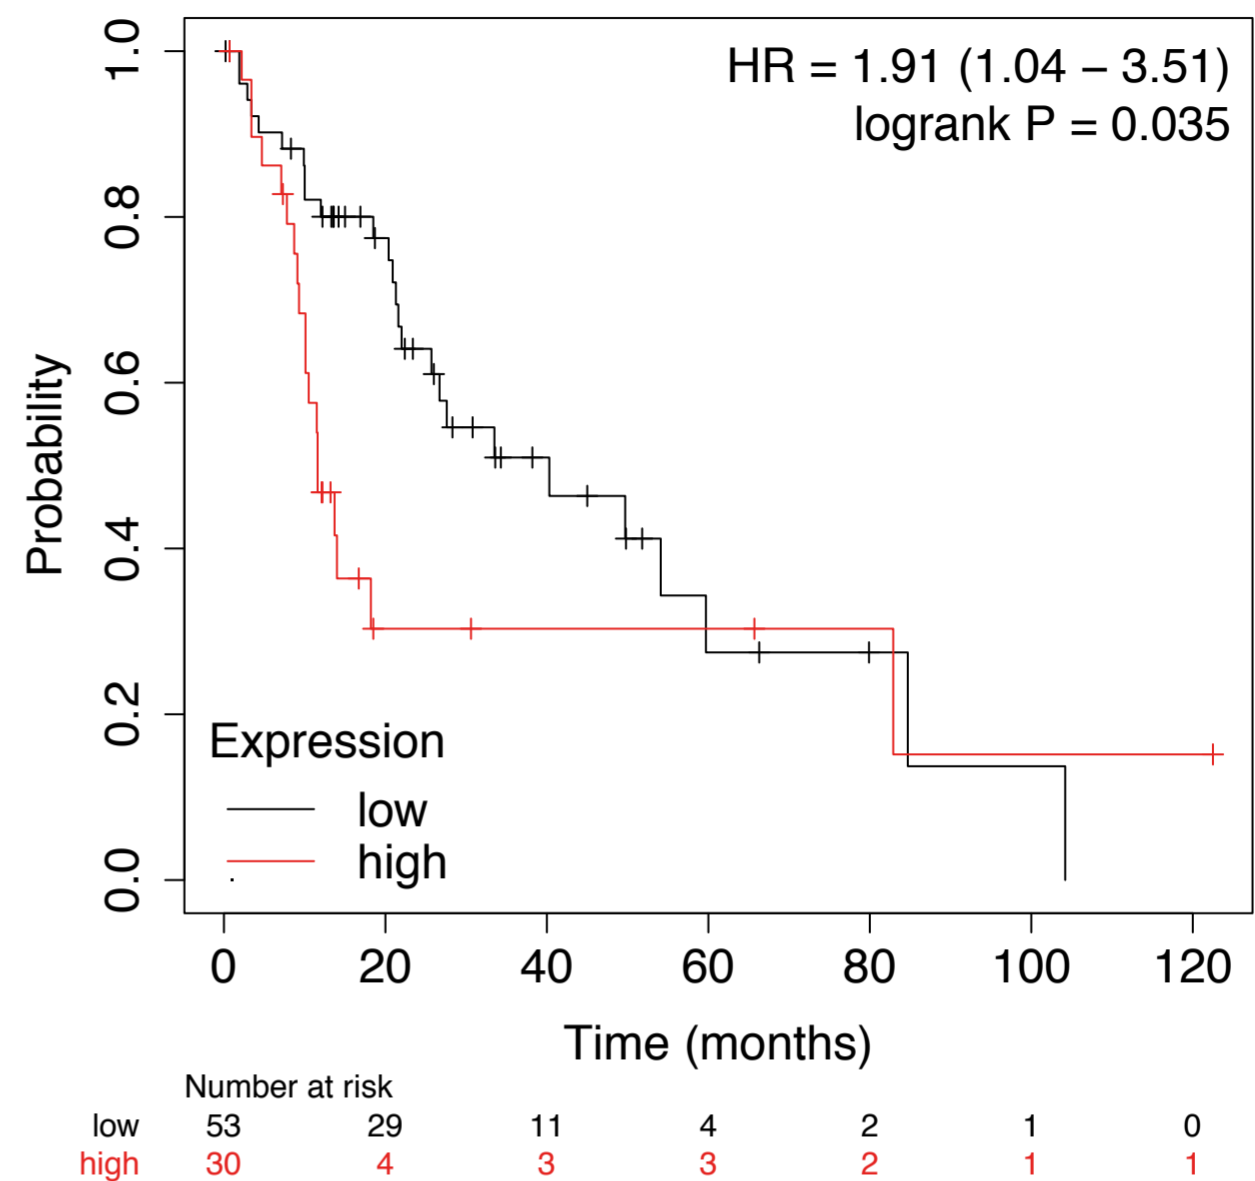**C**

Grade2 ~SCAMP3 mRNA expression  
**SCAMP3 (10067)**

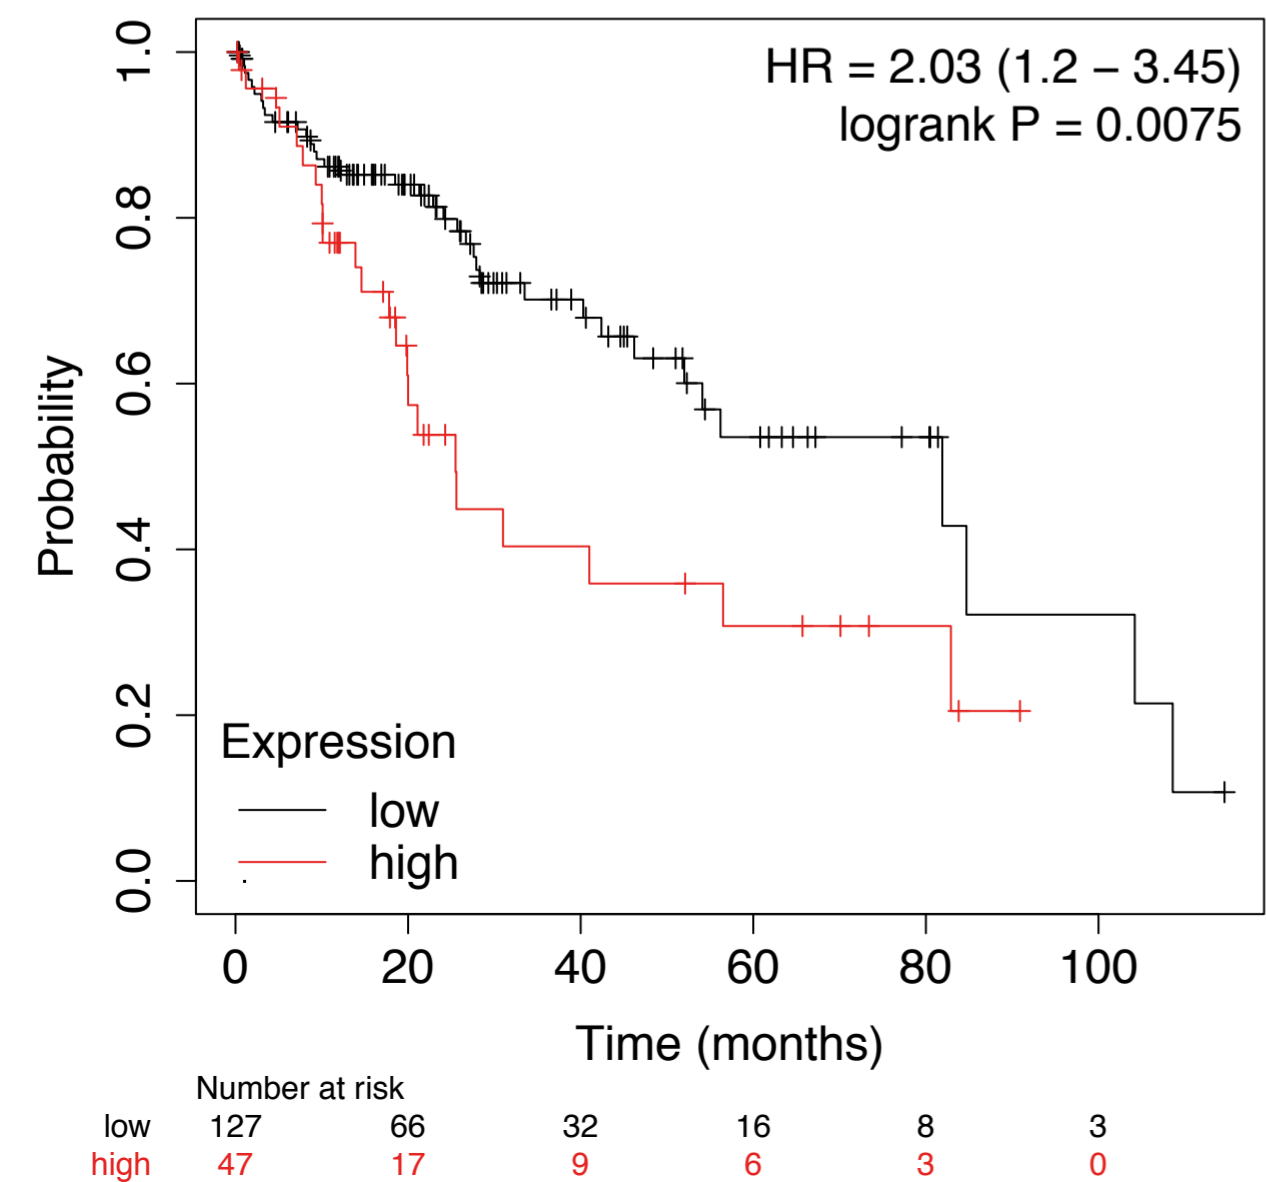**D**

Grade3 ~SCAMP3 mRNA expression  
**SCAMP3 (10067)**

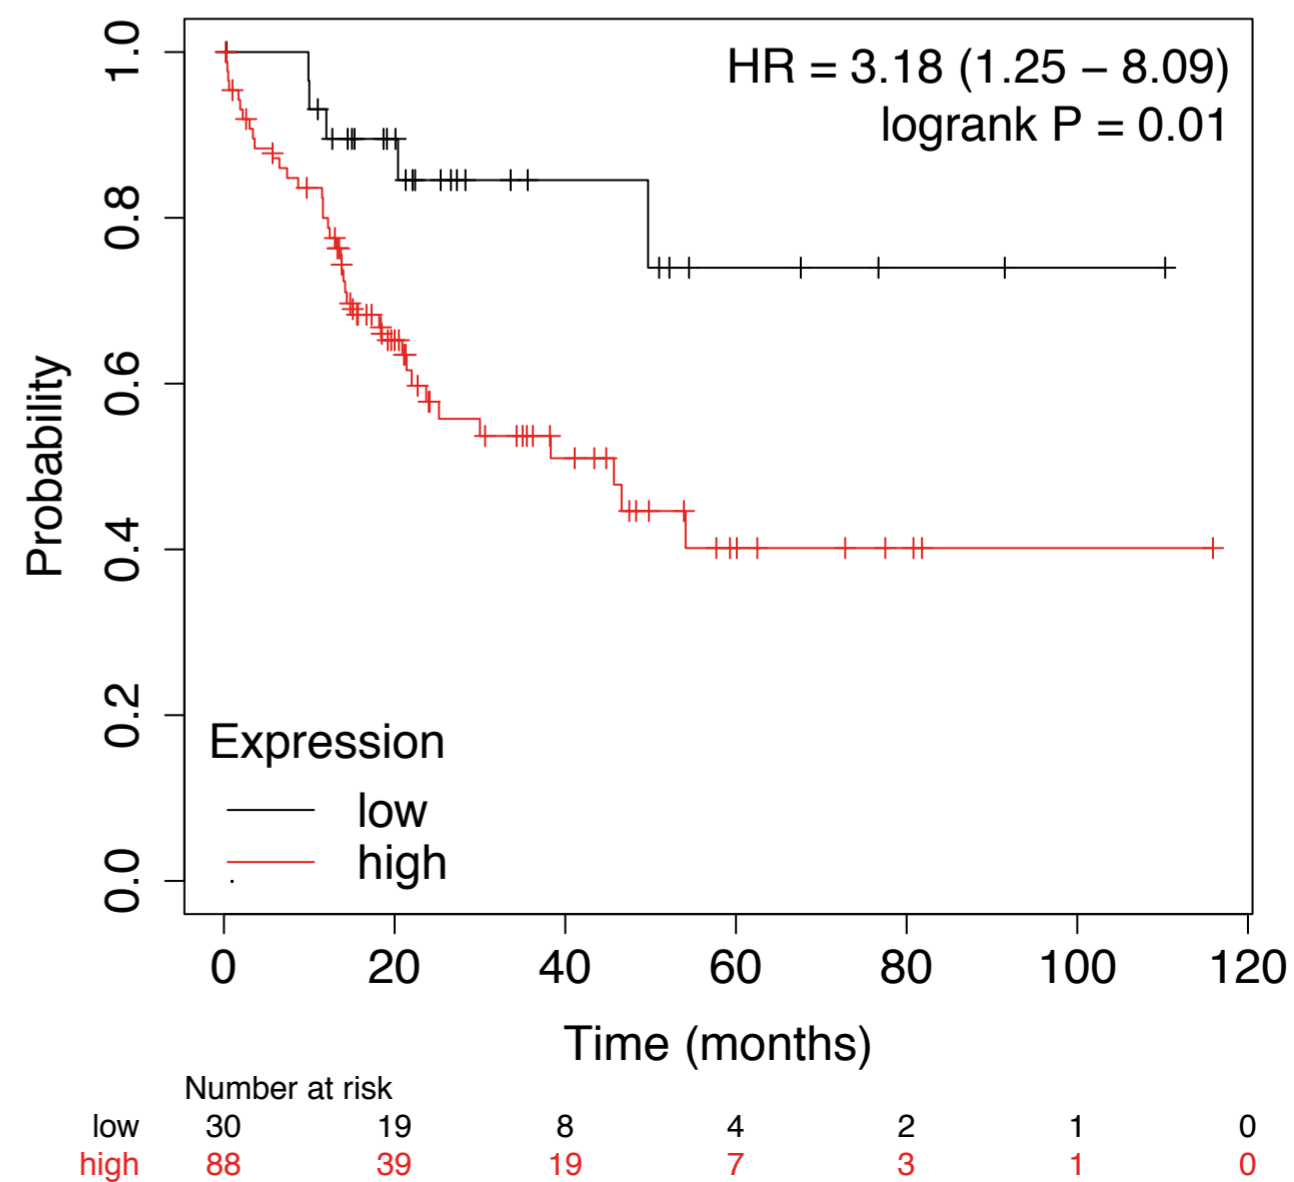

Supplement: Supplementary file 1 [file get_supplementary_file.php]
